# Supplementary material for: First Known Feeding Trace of the Eocene Bottom-Dwelling Fish Notogoneus osculus and Its Paleontological Significance
Source: PLoS One. 2010 May 5;5(5):e10420. doi: 10.1371/journal.pone.0010420 (PMC2864752; doi:10.1371/journal.pone.0010420)
Supplement: File S1 — This datafile contains the raw XY coordinates (in mm) from all the FOBU-12718 identified appendages and mouth marks. (0.08 MB XLS) [file pone.0010420.s003.xls]

## Sheet: Sheet1
Caudal_X	Caudal_Y	Anal_X	Anal_Y	Pelvic_high_X	Pelvic_high_Y	Pelvic_low_X	Pelvic_low_Y	Mouth_X	Mouth_Y
0.106965	7.31106	3.53148	7.57676	-0.129762	11.9499	0.886021	6.49529	22.5814	7.08817
0.136487	7.19298	3.91527	7.28154	0.066931	11.9936	1.07047	6.56117	22.7674	7.15019
0.343139	7.04537	4.26953	7.01585	0.241769	12.0592	1.22857	6.62704	22.8419	7.18739
0.461226	6.9568	4.56474	6.75015	0.351043	12.1029	1.34714	6.66657	22.9659	7.237
0.579313	6.77967	5.1847	6.45493	0.438463	12.1466	1.55794	6.70609	23.1643	7.29902
0.667878	6.66159	5.42087	6.2778	0.547736	12.1685	1.70286	6.74562	23.2511	7.34863
0.726921	6.30733	5.68657	6.10067	0.65701	12.1903	1.94001	6.79832	23.5612	7.32382
1.08118	5.98259	5.92274	5.8645	0.809994	12.2122	2.15081	6.83784	23.586	7.27421
1.28783	5.56928	6.07035	5.62833	1.22524	12.3652	2.44066	6.86419	24.6774	6.6913
1.55353	5.33311	21.1559	10.2042	3.30144	12.54	2.6778	6.89054	24.5038	6.6913
1.7897	5.00837	20.7426	10.2042	3.60741	12.54	2.82273	6.94324	24.3301	6.6913
2.02588	4.68363	20.5065	10.1451	3.84781	12.54	3.2048	6.96959	24.1937	6.59208
2.32109	4.47698	20.3589	10.0271	1.94644	12.4744	3.6264	6.96959	23.9953	6.49286
2.49822	4.15224	20.0932	9.96802	1.55306	12.4526	3.75814	6.96959	23.8713	6.26962
2.85248	3.85702	19.8275	9.79089	1.07225	12.3433	4.06117	6.96959	23.7472	6.24481
3.26579	3.59133	19.6208	9.76137	4.17563	12.4744	4.10069	6.96959	21.3412	6.62929
3.4134	3.35516	19.4437	9.55471	4.50345	12.4744	4.37736	6.96959	21.1055	6.60448
3.67909	3.17803	19.237	9.43663	4.76571	12.4089	4.56181	6.96959	20.8575	6.40604
4.03335	2.97137	19.0304	9.2595	5.00612	12.387	4.71991	6.96959	20.7458	6.40604
4.41713	2.67616	18.8532	9.05284	5.18095	12.3215	4.85166	6.96959	25.0867	6.50526
10.4986	2.08572	18.558	8.72811	5.48692	12.2122	5.08881	6.94324	25.2727	6.6913
10.6757	2.20381	18.2038	8.49193	5.79289	12.1248	5.23373	6.91689	25.3968	6.7285
10.8824	2.38094	17.8495	8.25576	6.05515	12.1029	5.41818	6.90372	25.62	6.6789
11.1186	2.55807	17.5543	7.99006	6.38297	12.0592	5.53675	6.90372	25.7812	6.6913
11.3547	2.82377	17.3181	7.66532	6.66708	11.9718	5.97152	6.86419	25.9301	6.77811
11.5909	3.11898	17.2	7.54724	7.06047	11.8625	6.12962	6.85102	25.9921	6.92694
11.768	3.38468	17.0229	7.37011	7.36643	11.7969	6.45899	6.75879	25.8308	7.69589
11.9747	3.73894	16.7572	7.01585	7.63962	11.7095	6.69614	6.66657	25.5456	7.86953
12.1813	4.00463	16.5801	6.9568	7.94559	11.644	6.84107	6.60069	25.3223	7.90673
12.388	4.35889	16.3439	6.63207	8.27341	11.5347	7.03869	6.56117	24.7146	6.98896
12.5356	4.56555	16.0782	6.48446	8.57937	11.4473	7.18361	6.52164	24.8262	6.98896
12.7423	4.86076	15.783	6.18924	8.92905	11.338	7.30219	6.48212	24.9875	6.90214
12.8308	5.21502	15.5763	5.95307	9.19131	11.2724	7.47346	6.3372	28.1873	8.254
12.9194	5.4512	15.3402	5.68737	9.47542	11.0976	7.65791	6.27132	28.2989	8.21679
13.126	5.8645	15.163	5.53976	9.75953	11.032	7.86871	6.25815	28.7454	7.7331
13.3327	6.24828			10.1311	10.7042	8.03998	6.16592	28.2989	6.95175
13.5393	6.69111			10.5026	10.6168	8.19808	6.00782	28.3609	7.00136
17.879	11.5917			10.8741	10.6168	8.42205	5.83655	28.3981	7.00136
17.6133	11.4441			11.2894	10.4638	8.6592	5.77068	27.6664	7.7083
17.4067	11.2965			11.5953	10.289	8.8173	5.71798	27.4183	7.94394
17.141	11.1489			11.8794	10.2234	9.01492	5.57305	27.2323	7.95634
16.8753	11.0013			12.2728	10.136	9.17302	5.45448	26.8478	8.05556
16.6096	10.647			12.5351	9.93928	9.34429	5.3886	28.8198	7.7207
22.6615	12.3298			12.8629	9.7863	9.50239	5.29638	29.4275	7.65869
22.8977	12.2707			13.3219	9.50219	9.64731	5.17781	29.2911	7.58427
23.1044	12.1231			13.6497	9.3492	10.0183	4.98389	29.3159	8.14238
23.2225	12.005			14.1086	9.08695	10.2447	4.73686	29.3159	8.20439
23.4882	11.9165			14.3709	8.99953	10.4712	4.63393	30.7546	7.53466
23.7243	11.7393			14.6769	8.91211	12.715	3.68699	30.9158	7.60908
23.99	11.3555			14.9173	8.84654	12.9414	3.56347	31.0399	7.36103
23.8719	11.5327			15.2232	8.80283	13.2091	3.39879	31.2879	7.67109
24.1967	11.2079			15.4636	8.78098	13.3943	3.33703	31.3003	7.53466
24.4033	11.0603			15.8789	8.75913	13.6619	3.25469	31.8212	7.7331
24.6395	10.8241			16.2941	8.60614	13.909	3.21351	31.7096	7.54706
24.7871	10.5585			16.6438	8.60614	14.0942	3.15176	31.4863	7.68349
24.9642	10.3223			17.1027	8.56243	14.4236	3.13117	31.8088	8.50205
25.1709	10.0861			17.5398	8.56243	14.6295	3.13117	32.032	8.61367
25.4661	9.79089			18.1955	8.56243	14.8971	3.04883	32.1685	8.7873
25.5842	9.37758			18.6544	8.54058	15.1235	3.04883	32.0693	7.77031
25.7908	9.08237			18.9385	8.56243	15.3294	3.04883	32.0693	7.91914
27.9164	5.4512			19.3538	8.628	15.6999	3.02824	32.5281	8.35322
28.1821	5.06741			19.8783	8.75913	16.0911	3.02824	32.6646	8.35322
28.4773	4.65411			20.3373	9.02138	16.2763	3.02824	32.7266	8.30361
28.684	4.47698			20.8618	9.13066	16.7498	3.02824	32.8134	8.2664
28.0345	5.24454			21.3644	9.41477	16.9557	3.02824	32.9002	8.254
28.2412	4.83124			21.9545	9.74259	17.3262	3.02824	33.0366	8.20439
28.9201	4.18176			22.2168	9.80816	17.7173	3.09	33.0862	8.17959
29.0973	3.8275			22.479	9.87372	15.4838	3.02824	33.1979	8.16718
29.2744	3.70942			22.6102	9.91743	15.8749	3.02824	33.2971	8.12998
29.422	3.47324			22.8943	10.0486	16.4719	3.04883	33.756	7.84472
29.6287	3.32563			23.2658	10.1578	17.1101	3.02824	33.8924	8.03076
29.8944	3.05994			23.4625	10.3327	17.5424	3.09	31.9452	7.28661
30.4553	2.61711			23.8122	10.4419	17.9952	3.13117	31.8832	7.28661
30.101	2.88281			24.0089	10.5949	18.2011	3.13117	31.6848	7.33622
26.0868	8.63954			24.2711	10.6823	18.3658	3.17234	33.942	7.60908
26.1977	8.32023			25.0797	11.0976	18.7157	3.21351	34.1281	7.58427
30.78	2.38887			25.4076	11.185	18.9628	3.25469	34.2273	7.50986
38.1741	1.84696			25.9321	11.2943	19.2304	3.29586	34.4009	7.39823
38.375	1.98091			25.648	11.2506	19.4362	3.31644	34.5125	7.31142
38.5089	2.12602			26.2162	11.3817	19.6833	3.31644	34.6117	7.24941
38.7098	2.37159			26.4566	11.4473	20.0126	3.43996	34.5373	7.60908
38.8438	2.49437			26.7189	11.5565	20.3626	3.46054	34.6862	7.68349
38.9777	2.65064			26.9155	11.6002	20.6302	3.60464	34.8102	7.55947
39.0782	2.76227			27.156	11.7095	21.0008	3.74874	34.897	7.55947
39.2121	2.97435			27.5493	11.7532	21.186	3.87226	35.083	7.55947
39.3684	3.16411			27.8772	11.8625	21.4948	3.93402	35.2443	7.55947
39.5135	3.39851			28.2924	11.8625	21.6801	4.03694	35.2939	7.49745
39.6586	3.62176			28.6421	11.8625	21.9477	4.11929	34.5001	8.01836
39.8149	3.86733			29.0792	11.8625	22.3183	4.2428	34.5001	7.83232
40.0716	4.13522			29.4289	11.8407	22.5447	4.28397	34.3141	7.79511
40.2279	4.45892			29.8878	11.8407	22.8329	4.36632	34.1529	7.79511
40.4846	4.69333			30.2593	11.8188	23.0388	4.48983	45.8483	6.03397
40.632	4.90541			30.5872	11.7969	23.2652	4.51042	46.0468	6.08358
40.7548	5.09517			30.9587	11.7532	23.6769	4.69569	46.6917	6.14559
40.8776	5.28493			31.3521	11.6002	24.0063	4.92213	46.8405	6.14559
41.0227	5.5305			31.7017	11.5565	24.418	5.04565	46.9645	6.14559
41.1789	5.77606			32.0951	11.4691	24.7062	5.14857	47.1754	6.39364
41.3017	6.04396			32.4448	11.3817	24.9738	5.31326	47.3242	6.55487
41.5473	6.40115			32.8382	11.2287	25.2414	5.37502	47.4482	6.66649
41.737	6.69137			33.2316	11.2069	25.5914	5.51912	46.9397	6.92694
41.9268	6.92577			33.5594	11.0976	25.9825	5.62205	47.1258	6.92694
42.1054	7.26064			33.8217	10.879	28.3989	6.15333	47.2374	6.92694
42.0049	7.10437			34.3025	10.7042	28.6976	6.19407	47.3738	7.16259
41.804	6.80299			34.6303	10.5949	28.9285	6.24838	47.4234	7.2122
41.6254	6.54626			34.9581	10.5075	29.2136	6.24838	47.5103	7.28661
41.4022	6.18907			35.4826	10.3764	29.3901	6.24838	47.2374	5.98436
41.2347	5.89885			35.876	10.2453	29.6209	6.2348	47.3366	5.87274
41.0673	5.64212			36.2694	10.136	29.7974	6.2348	47.4606	5.86034
40.9445	5.39655			36.5535	10.0704	30.0147	6.22122	47.5599	5.92235
42.15	7.37226			37.0343	9.83001	30.2998	6.18049	47.7707	6.23241
42.2952	7.5397			37.4277	9.74259	30.5578	6.15333	47.9071	6.23241
42.4291	7.6848			37.7337	9.58961	30.7207	6.13976	48.1056	6.1704
42.563	7.82991			38.1489	9.50219	30.9108	6.13976	48.2792	6.14559
42.7193	7.9527			38.433	9.39291	31.196	6.07187	48.428	6.15799
42.7975	8.05316			38.7827	9.28364	31.4947	5.9904	48.5272	5.99676
43.0095	8.19827			39.2635	9.15251	31.7391	5.92251	48.5893	5.95956
43.2886	8.34338			39.635	8.93396	32.0785	5.90893	48.6885	6.12079
43.523	8.47732			40.0284	8.78098	32.3093	5.84104	48.8497	6.03397
43.7016	8.6894			40.5529	8.628	32.5945	5.65095	49.8419	6.65409
43.8802	8.85684			45.0113	7.60082	44.7301	2.42325	50.0527	6.6789
44.2039	9.06892			45.5795	7.77566	44.8574	2.42325	50.0776	6.56727
44.4495	9.23635			45.9292	7.97235	45.218	2.50811	50.09	6.49286
44.0141	8.97962			46.3663	8.01606	45.3878	2.50811	50.1644	6.48046
43.7686	8.76754			46.8034	8.14719	45.706	2.59297	50.3008	6.48046
44.3155	9.16938			47.1749	8.30017	45.8121	2.6354	50.524	6.53007
44.6169	9.34798			47.8087	8.60614	46.1303	2.67783	50.5985	6.53007
44.9518	9.52657			48.1147	8.71542	46.4061	2.74148	50.7845	6.51766
45.1415	9.63819			48.5081	8.8684	46.6607	2.82634	50.8713	6.28202
45.3871	9.74982			48.9015	9.06509	46.9365	2.9112	50.8961	6.25721
45.6661	9.88376			49.273	9.23993	47.2123	2.97485	51.0077	6.25721
45.4876	9.81679			49.8194	9.48033	47.6154	3.16579	51.2434	6.25721
44.7955	9.42611			50.3439	9.85187	47.3608	3.08093	51.4046	6.25721
45.8336	9.98422			49.5353	9.39291	47.8912	3.187	51.5286	6.31923
46.001	10.0512			40.9682	8.56243	48.1246	3.20822	50.1768	5.99676
46.1461	10.0958			41.1867	8.40945	48.4428	3.35672	49.9783	5.95956
46.2801	10.1405			41.5801	8.32203	48.6061	3.50311	49.8543	5.92235
46.3917	10.1963			41.8861	8.10348	48.9456	3.62192	49.7551	5.92235
46.5814	10.2521			42.1921	7.84122	49.1153	3.7577	49.6807	5.93475
46.7042	10.2856			53.2724	10.9009	49.3699	3.7577	49.5939	5.97196
46.8493	10.3414			53.6221	10.9665	49.5905	3.89347	49.5194	5.92235
47.0503	10.3972			53.7969	10.9665	49.8281	3.89347	49.1226	5.62469
47.2512	10.4084			54.1466	11.0757	49.9809	3.97833	49.1102	5.74871
47.3963	10.4307			54.4089	11.0757	50.2864	4.0632	49.3458	5.56268
47.5302	10.4865			54.6493	11.0757	50.4052	4.0632	49.197	5.50067
47.72	10.4977			54.9334	11.1194	50.6598	4.16503	51.541	6.1704
47.8428	10.52			55.2831	11.185	50.9653	4.31778	51.7395	6.15799
48.0549	10.5647			55.6328	11.185	51.2029	4.35173	51.8511	6.15799
48.2223	10.5758			55.9169	11.185	51.4066	4.43659	51.9999	6.2076
48.4232	10.5758			56.2665	11.185	51.763	4.52145	52.1115	6.2076
48.3228	10.5758			56.5069	11.185	52.0176	4.52145	52.2356	6.1952
48.6018	10.5981			56.9222	11.1632	52.4928	4.74209	52.372	6.08358
48.7358	10.5981			57.3593	11.0757	52.7474	4.793	52.4216	5.95956
48.8697	10.6205			57.7527	11.0102	52.1873	4.60631	52.1488	5.84793
49.0148	10.6316			58.1679	10.9883	53.0189	4.89484	52.2356	5.84793
49.1599	10.6316			58.6706	10.8135	53.2735	4.89484	52.5828	5.89754
49.2939	10.6428			59.0202	10.8135	53.579	5.11548	52.8681	6.08358
49.4167	10.654			59.5229	10.6605	53.8166	5.14942	53.0789	6.41844
49.5506	10.6651			59.8726	10.5731	54.1391	5.23428	53.1782	6.40604
49.718	10.6651			60.3097	10.5512	54.4446	5.2852	53.4262	6.35643
49.9413	10.6651			60.7249	10.4857	54.7841	5.33612	53.5874	6.2076
49.852	10.6651			61.1402	10.4201	57.7372	5.69254	53.6122	6.1828
50.0752	10.654			61.5991	10.2015	58.1615	5.69254	54.2076	6.46805
50.2538	10.654			62.0799	10.0923	58.3313	5.69254	54.0091	6.36883
50.4101	10.6428			62.67	9.98299	58.6028	5.48887	53.9099	6.29442
50.5217	10.6428			62.9978	9.85187	58.8235	5.45492	53.8355	6.23241
50.678	10.6316			63.5223	9.72074	59.0102	5.43795	51.0697	7.42304
50.8677	10.6205			64.0687	9.58961	59.1799	5.43795	50.9333	7.38583
51.0575	10.5647			64.5277	9.3492	59.2817	5.40401	50.9209	7.2122
51.2361	10.5312			65.0522	9.26179	59.4514	5.37006	53.451	7.63388
51.4035	10.5088			65.6204	9.08695	59.6721	5.30217	53.2774	7.60908
51.5933	10.3861			66.2323	8.95582	59.8588	5.21731	55.3238	6.48046
51.7496	10.3079			66.6913	8.84654	59.9267	5.20034	55.1997	6.53007
51.9728	10.2075			67.0847	8.71542	60.1982	5.18337	55.0757	6.53007
52.263	10.0735			67.4125	8.628	60.4019	5.08153	57.9655	7.34863
52.4193	9.90609			67.9151	8.47501	60.6056	4.9797	57.8539	7.33622
52.7207	9.76098			68.1993	8.4313	60.6734	4.96273	57.7174	7.26181
52.8546	9.56006			68.5052	8.34388	61.0129	4.84392	57.5934	7.2122
53.1448	9.25868			68.8549	8.23461	61.2166	4.84392	57.4074	7.00136
53.3681	9.10241			69.0953	8.21276	63.1944	4.051	57.2958	6.93935
53.6136	8.868			69.4231	8.16905	63.5656	3.97144	59.0941	7.44784
53.7811	8.74522			69.8602	8.10348	63.8308	3.73277	59.0569	7.44784
53.9932	8.46616			70.3629	8.03792	63.9899	3.70625	58.8709	7.26181
54.1494	8.23175			70.7563	7.97235	64.2021	3.60017	58.5608	7.44784
54.395	8.06432			71.6086	7.81937	64.3612	3.54713	58.3252	7.46025
54.5178	7.87456			72.0238	7.77566	63.3004	4.051	56.614	8.69369
54.808	7.6848			72.2861	7.7538	64.5999	3.49409	56.3915	8.7215
55.0871	7.43924			72.8325	7.7538	64.759	3.44106	56.2385	8.51293
56.873	5.34074			73.204	7.84122	66.0319	3.28194	55.9326	8.31827
57.4758	4.65984			73.8378	7.97235	66.2706	3.25542	56.8528	7.55367
57.286	4.81611			73.51	7.9505	66.5888	3.09631	56.9049	7.72747
57.1521	4.96122			74.1438	8.08163	66.801	3.04327	57.0787	7.797
57.0516	5.03936			74.5372	8.21276	67.1722	2.85763	57.3047	7.90128
56.9512	5.13982			75.1272	8.47501	67.8087	2.72504	58.0347	7.69271
56.7502	5.45236			75.8047	8.71542	68.286	2.64548	58.3301	7.84914
57.5986	4.54822			76.067	8.71542	68.7369	2.61896	58.643	8.09247
57.7325	4.44776			76.2418	8.80283	69.0816	2.56592	59.2687	7.18868
57.9334	4.29149			76.7663	8.91211	69.3998	2.5394	60.1551	7.37986
58.0785	4.15754			77.1597	9.13066	69.7711	2.45985	60.242	7.37986
58.3241	4.00127			77.6187	9.26179	70.1424	2.51288	60.3637	7.32772
58.5027	3.87849			78.5584	9.67703	70.3545	2.48636	60.3811	7.22344
58.7259	3.73338			78.9081	9.87372	70.6463	2.56592	58.8168	8.19675
58.9492	3.53246			79.2359	9.93928	70.9114	2.56592	58.9906	8.07509
59.1724	3.40967			79.4982	10.0923	71.1501	2.56592	59.3035	8.04033
59.4068	3.26457			80.6783	10.289	71.4683	2.51288	59.4773	7.93604
59.6859	3.05248			81.1154	10.4419	71.8131	2.61896	62.7101	7.13653
59.9873	2.94086			81.334	10.5294	72.2639	2.64548	62.7101	7.03225
60.3445	2.69529			81.5963	10.5294	72.1578	2.64548	62.8839	7.03225
60.7017	2.52786			81.8367	10.5949	71.6275	2.64548	63.0403	7.08439
61.0365	2.40507			82.2737	10.6168	72.6087	2.72504	63.162	7.13653
61.2933	2.30461			82.4923	10.7042	72.8739	2.72504	63.3358	7.22344
61.5723	2.15951			82.7546	10.7698	73.2451	2.75156	63.1793	7.65795
60.5007	2.62832			82.995	10.7479	73.4573	2.80459	62.8665	7.36248
60.1435	2.79575			83.1917	10.7479	73.7755	2.85763	63.8572	7.22344
61.8067	2.08137			83.4539	10.7479	74.0142	2.93719	64.0657	7.20606
62.0411	2.03672			83.7162	10.7261	74.2794	3.01675	64.1874	7.20606
62.2644	1.98091			83.9784	10.7916	74.7832	3.09631	64.3091	7.11915
62.4653	1.88045			84.2844	10.8135	75.2606	3.25542	64.396	6.96273
62.7109	1.82464			84.5248	10.7479	75.0219	3.17586	64.5698	6.96273
62.9341	1.80231			84.6996	10.7916	75.5788	3.28194	64.7957	6.84106
65.0214	1.59023			85.093	10.7916	75.7379	3.3615	65.0564	7.2582
65.1554	1.63488			85.4208	10.7042	76.0031	3.46758	64.9348	7.2582
65.4233	1.66837			85.8798	10.7042	76.1622	3.46758	64.761	7.2582
65.6019	1.66837			86.295	10.6386	76.3744	3.54713	64.6741	7.31034
65.8921	1.73534			86.9288	10.4638	76.7191	3.62669	64.5524	7.51891
66.1488	1.85813			86.5791	10.5512	77.0109	3.73277	66.1117	6.84394
66.506	2.0144			87.2348	10.3764	77.3291	3.86536	66.0054	6.84394
66.3274	1.91394			87.5626	10.2453	77.5412	3.89188	65.9376	6.84394
66.7516	2.15951			87.8249	10.2453	77.7004	3.99796	65.8119	6.84394
66.9748	2.3381			88.2183	10.2015	77.833	4.051	65.6862	6.84394
67.2092	2.49437			88.5242	10.136	78.2307	4.10404	65.5798	6.94065
67.4325	2.69529			88.7646	10.0704	78.4429	4.15707	66.8565	7.11474
67.6446	2.90737			89.2236	9.96114	78.6285	4.26315	67.0209	6.96967
67.8343	3.10829			89.5733	9.89557	78.9468	4.31619	67.0983	6.94065
68.0464	3.33154			89.8792	9.7863	79.0263	4.34271	67.1466	6.90197
68.2696	3.53246			90.2289	9.5459	79.4771	4.4753	67.2433	6.76656
68.4817	3.78919			90.5786	9.48033	79.7423	4.4753	62.3108	6.82459
68.6715	4.0236			90.972	9.39291	79.9015	4.6079	67.9204	6.75689
68.8501	4.258			91.3435	9.26179	80.2197	4.6079	68.1428	6.6505
69.0287	4.51473			91.8024	9.08695	80.4584	4.68746	68.2298	6.49575
69.2408	4.79379			92.2832	8.93396	80.8031	4.71398	68.8198	6.81492
69.4082	5.03936			93.7038	8.58429	81.0683	4.79354	68.6747	6.83426
69.5756	5.22912			92.6985	8.82469	81.4396	4.92613	68.5587	6.79558
69.7319	5.43004			93.2449	8.73727	81.7578	4.92613	68.3169	6.86328
69.9663	5.77606			93.4853	8.69356	82.076	4.97917	69.3518	7.35654
70.2565	6.21139			93.8786	8.54058	82.3412	5.08525	69.1873	7.2308
70.5467	6.64672			94.1409	8.49687	82.4208	5.11177	69.1777	7.20179
70.8481	6.9481			94.4687	8.4313	83.2694	5.35044	69.0229	7.17277
71.2165	7.41691			94.7528	8.34388	83.4815	5.48303	67.5045	7.50161
72.288	8.06432			95.0807	8.32203	84.0384	5.53607	66.9822	7.73373
71.049	7.14902			95.4522	8.30017	83.7202	5.45652	66.7888	7.78209
70.1337	5.98815			95.8674	8.16905	85.2318	5.05873	65.9183	7.59833
70.424	6.41231			96.2827	8.16905	85.7092	5.05873	66.0344	7.66603
72.6006	8.24292			96.5449	8.12534	85.9478	5.05873	70.0482	7.0379
72.8685	8.39919			97.6377	7.97235	86.4252	5.05873	70.086	7.18902
73.2257	8.58894			98.0311	7.92864	86.9821	5.05873	70.3882	6.94345
73.4712	8.71173			98.4463	7.92864	87.3534	5.05873	70.4449	6.86789
73.661	8.80103			98.6867	7.92864	87.8572	4.97917	71.2005	6.86789
73.9066	8.91265			98.949	7.92864	88.3876	4.7405	71.4461	6.86789
74.1856	8.99078			99.1675	7.92864	85.8683	5.74823	72.3717	6.96234
74.5205	9.12473			99.4298	7.92864	86.213	5.74823	72.5984	6.849
74.8777	9.25868			99.7357	8.03792	86.3456	5.48303	72.6739	6.75455
75.1679	9.32565			100.238	8.08163	86.0009	5.72171	72.7306	6.69788
75.4023	9.41495			100.632	8.21276	89.3423	4.52834	72.8439	6.69788
75.6255	9.43727			101.025	8.30017	89.6605	4.52834	72.9195	6.73566
75.8488	9.48192			101.353	8.40945	89.8196	4.52834	73.0706	6.73566
76.139	9.52657			101.615	8.56243	90.1379	4.50182	73.2028	6.73566
76.3064	9.59354			102.096	8.628	90.4031	4.36923	73.3162	6.79233
76.5297	9.59354			102.271	8.71542	90.5357	4.26315	73.4673	6.83011
76.6971	9.61587			102.795	8.89025	90.6948	4.21011	73.5051	6.86789
76.9092	9.61587			102.992	8.93396	90.7743	4.15707	73.6751	6.86789
77.1436	9.63819			103.254	9.04324	91.0926	4.10404	73.694	6.71677
77.4227	9.63819			103.757	9.15251	91.2782	4.02448	73.0517	6.58454
77.7129	9.56006			102.511	8.80283	91.729	3.70625	71.8805	6.07451
77.9361	9.53773			101.834	8.58429	92.1268	3.67973	75.3941	6.22563
78.2598	9.44844			99.998	8.05977	92.6572	3.57365	75.8286	6.33897
78.5947	9.40379			100.435	8.16905	92.392	3.57365	76.1497	6.35786
78.8514	9.30333					91.9677	3.73277	76.433	6.41453
79.0747	9.24752					92.7898	3.49409	76.8675	6.50898
79.3091	9.13589					93.1345	3.46758	77.132	6.6601
79.4654	9.05776					93.3467	3.41454	77.3209	6.81122
79.7221	8.90149					93.5588	3.38802	77.7553	6.75455
79.923	8.80103					93.718	3.3615	78.2276	6.77344
80.0793	8.55546					95.4152	2.672	78.4165	6.92456
80.3807	8.33221					95.6008	2.672	78.5487	6.90567
80.6262	8.09781					95.9456	2.672	78.851	6.92456
80.8383	7.93037					96.3964	2.5394	79.0399	6.98123
80.9946	7.74062					96.7942	2.5394	79.191	6.98123
81.1062	7.50621					97.1389	2.51288	79.361	6.98123
81.2401	7.34994					97.3511	2.51288	79.701	7.20791
81.6085	6.95926					97.7224	2.51288	79.9466	7.34014
81.3406	7.20483					98.0141	2.48636	80.041	7.39681
81.8429	6.73602					98.2527	2.48636	79.3421	6.18785
81.988	6.51277					98.624	2.56592	79.4743	6.18785
82.122	6.31185					98.9688	2.61896	79.4743	6.05562
82.2392	6.16674					99.287	2.672	79.531	6.05562
82.4178	5.91001					99.6317	2.77808	79.6066	6.15007
82.3285	6.02163					100.03	2.77808	79.701	6.16896
82.5182	5.79839					100.348	2.91067	79.7766	6.22563
82.6522	5.66444					100.772	3.01675	79.871	6.33897
82.7973	5.50817					101.17	3.06979	79.9655	6.39564
82.9424	5.31841					101.568	3.14934	80.0977	6.43342
83.0317	5.18447					101.727	3.20238	80.1733	6.45231
83.1321	5.07284					102.018	3.25542	80.2111	6.50898
83.2214	4.92774					102.337	3.3615	80.4	6.54676
83.3777	4.77146					102.496	3.44106	80.4377	6.54676
83.5451	4.60403					102.655	3.52061	80.57	6.54676
83.6791	4.50357					102.841	3.62669	80.9855	6.4712
83.7796	4.40311					103.238	3.70625	81.0611	6.4712
84.5163	3.48781					103.583	3.70625	81.2689	6.4712
84.6614	3.33154					103.848	3.70625	81.3822	6.4712
84.7953	3.21992					104.06	3.75929	80.3244	7.66127
84.9739	3.06365					104.326	3.75929	80.4	7.73683
85.1079	2.96319							80.7778	8.15241
85.2418	2.85156							81.0233	8.1713
85.3981	2.70645							81.0422	8.13352
85.5767	2.57251							81.25	8.13352
85.7999	2.40507							81.4389	8.13352
86.0008	2.3381							81.8545	6.90567
86.2129	2.2488							82.0056	6.90567
86.3469	2.12602							82.2701	6.90567
86.5031	2.08137							82.4967	6.88678
86.6371	1.96975							82.0434	7.05679
86.8157	1.89161							82.1945	7.28347
86.9273	1.79115							82.3834	7.39681
87.9765	1.36699							82.6856	7.49126
88.211	1.27769							82.7612	7.58571
88.3226	1.2442							82.9501	7.75572
88.557	1.21072							83.0068	7.7935
88.7579	1.17723							83.3279	8.77578
88.9142	1.16607							83.479	8.77578
89.7402	1.03212							83.8002	8.75689
89.9746	0.97631							83.2524	7.85017
90.1197	0.953985							83.3846	7.71794
90.2983	0.953985							83.5924	7.43459
90.4657	0.953985							83.8946	7.34014
90.6108	0.987472							83.9513	7.28347
90.7001	1.03212							83.2335	8.00129
90.8452	1.07677							83.4979	8.02018
90.9345	1.08793							83.8379	7.96351
91.0573	1.16607							84.4235	7.71794
91.1355	1.18839							84.7258	7.69905
93.0219	2.25997							82.7423	6.58454
93.1781	2.4274							83.1579	6.39564
93.3679	2.58367							83.4979	6.6601
93.513	2.72878							87.3515	7.17013
93.7028	2.91854							87.6348	7.17013
93.8702	3.07481							87.8615	7.17013
94.0153	3.24224							88.1071	7.17013
94.1716	3.40967							88.3149	7.17013
94.3502	3.58827							87.7482	6.90567
94.4506	3.71105							88.466	7.05679
94.5176	3.92314							88.7305	7.00012
94.6739	4.10173							89.1083	7.00012
94.819	4.33614							89.2405	7.01901
94.9753	4.5259							89.4105	7.01901
95.0869	4.68217							89.5427	7.01901
95.2432	4.87192							88.1638	7.94462
95.3994	5.11749							88.7116	7.75572
95.5334	5.38539							89.2405	7.75572
95.6003	5.54166							89.3538	7.94462
95.712	5.74258							89.7505	7.86906
95.8236	6.08861							90.0717	7.85017
95.9707	6.55603							90.185	7.77461
96.0823	6.69555							90.4495	7.75572
96.2218	6.9467							90.6573	7.54793
96.3334	7.1839							90.8273	7.75572
96.473	7.40714							91.1106	7.92573
96.6404	7.75596							91.2806	8.05796
96.8357	8.02107							91.5262	8.09574
97.1008	8.31408							91.6206	8.09574
97.3241	8.4257							91.5073	7.24569
97.4636	8.53732							91.564	7.13235
97.7845	8.81637							91.6206	7.07568
98.0217	8.99776							91.6962	7.0379
98.231	9.27682							91.3184	6.75455
98.5101	9.47216							91.2051	6.75455
98.7612	9.62564							84.1213	8.47354
98.817	9.70935							101.292	7.28347
102.166	11.1744							101.462	7.28347
102.431	11.2442							101.613	7.28347
102.598	11.2442							101.651	7.28347
102.794	11.2442							101.991	7.28347
103.045	11.1325							102.124	7.28347
103.282	11.1046							102.388	7.28347
103.561	11.0349							102.539	7.24569
103.882	10.9651							102.709	7.20791
104.133	10.8953							102.974	7.26458
104.384	10.7698							103.106	7.35903
								99.2711	6.30119
								99.7245	6.52787
								100.121	6.60343
								100.915	6.88678
								101.292	6.71677
								101.727	6.4712
								102.029	6.45231
								103.994	6.37675
								104.258	6.4712
								104.428	6.50898
								104.428	7.15124
								104.277	7.05679
								104.164	7.0379
								103.521	7.35903
								103.824	7.51015
								103.559	6.67899
								99.1578	6.90567
								99.0255	6.77344
								98.8744	6.4712
								96.6832	5.39446
								97.741	6.26341
